# Supplementary material for: Nutritional Intake, White Matter Integrity, and Neurodevelopment in Extremely Preterm Born Infants
Source: MDPI journal article supplement (doi:10.3390/nu13103409), 2021-09-27
Supplement: s1 [file s1]

**Table S2.** Baseline characteristics of the children included in cohort A and B

|                                           | DTI analysis            |                         | 2 years corrected age   |                         | 5.9 years chronological age |                         |
|-------------------------------------------|-------------------------|-------------------------|-------------------------|-------------------------|-----------------------------|-------------------------|
|                                           | Cohort A<br>(N = 63)    | Cohort B<br>(N = 60)    | Cohort A<br>(N=95)      | Cohort B<br>(N=66)      | Cohort A<br>(N=92)          | Cohort B<br>(N=62)      |
| Male (%)                                  | 25 (40)                 | 32 (53)                 | 42 (44)                 | 33 (50)                 | 40 (44)                     | 30 (48)                 |
| Gestational age (weeks) (median (Q1; Q3)) | 26 + 3 (25 + 6; 27 + 1) | 26 + 4 (26 + 0; 27 + 2) | 26 + 3 (25 + 6; 27 + 2) | 26 + 3 (25 + 6; 27 + 0) | 26 + 3 (26 + 5; 27 + 2)     | 26 + 5 (26 + 0; 27 + 1) |
| Birth weight (g) (median (Q1; Q3))        | 880 (792; 1000)         | 878 (784; 1005)         | 870 (750; 998)          | 875 (780; 958)          | 865 (749; 991)              | 878 (781; 1000)         |
| Birth weight Z-score (mean (SD))          | 0.53 (0.85)             | 0.25 (0.89)             | 0.31 (0.92)             | 0.27 (0.90)             | 0.31 (0.93)                 | 0.23 (0.87)             |
| SGA (<10 <sup>th</sup> percentile) (%)    | 2 (3)                   | 3 (5)                   | 5 (5)                   | 3 (5)                   | 5 (5)                       | 3 (5)                   |
| Multiplicity (%)                          | 20 (33)                 | 16 (27)                 | 27 (30)                 | 21 (32)                 | 28 (32)                     | 20 (32)                 |
| Apgar 5 min (median (Q1; Q3))             | 8 (7; 9)                | 8 (6; 8)                | 8 (7; 9)*               | 8 (7; 8)*               | 8 (7; 9)                    | 8 (7; 8)                |
| Days parental nutrition (median (Q1; Q3)) | 12 (9; 15)              | 13 (10; 18)             | 12 (9; 16)              | 13 (10; 18)             | 12 (9; 16)                  | 12 (10; 17)             |
| >7 days of ventilation (%)                | 32 (51)                 | 30 (50)                 | 48 (51)                 | 35 (53)                 | 47 (51)                     | 32 (52)                 |
| Abdominal surgery (%)                     | 5 (8)                   | 5 (8)                   | 9 (10)                  | 5 (8)                   | 9 (10)                      | 5 (8)                   |
| Severe brain injury (%)                   | 8 (13)                  | 6 (10)                  | 10 (11)                 | 7 (11)                  | 9 (10)                      | 6 (10)                  |
| Sepsis (%)                                | 26 (41)                 | 22 (37)                 | 39 (41)                 | 23 (35)                 | 37 (40)                     | 22 (35)                 |

*DTI = diffusion tensor imaging; SGA = small for gestational age; \*p<0.05*
