# Supplementary material for: Nutritional Intake, White Matter Integrity, and Neurodevelopment in Extremely Preterm Born Infants
Source: MDPI journal article supplement (doi:10.3390/nu13103409), 2021-09-27
Supplement: s1 [file s1]

**Table S1.** Baseline characteristics of the included and excluded children

|                                           | DTI analysis            |                         | 2 years corrected age   |                         | 5.9 years chronological age |                         |
|-------------------------------------------|-------------------------|-------------------------|-------------------------|-------------------------|-----------------------------|-------------------------|
|                                           | Included (n=123)        | Excluded (n=55)         | Included (n=161)        | Excluded (n=17)         | Included (n=154)            | Excluded (n=24)         |
| Male (%)                                  | 57 (46)                 | 27 (49)                 | 75 (47)                 | 9 (53)                  | 72 (47)                     | 12 (50)                 |
| Gestational age (weeks) (median Q1; Q3))  | 26 + 3 (25 + 6; 27 + 2) | 26 + 3 (25 + 3; 27 + 2) | 26 + 3 (25 + 6; 27 + 1) | 27 + 1 (25 + 3; 27 + 2) | 26 + 3 (25 + 6; 27 + 2)     | 26 + 4 (25 + 5; 27 + 2) |
| Birth weight (g) (median (Q1; Q3))        | 880 (784; 1000)*        | 835 (698; 913)*         | 870 (750; 995)          | 840 (695; 1025)         | 870 (750; 1000)             | 858 (710; 963)          |
| Birth weight Z-score (mean (SD))          | 0.39 (0.88)*            | 0.01 (0.92)*            | 0.30 (0.91)             | 0.08 (0.89)             | 0.28 (0.90)                 | 0.24 (0.96)             |
| SGA (<10 <sup>th</sup> percentile) (%)    | 5 (4)                   | 5 (9)                   | 8 (5)                   | 2 (12)                  | 8 (5)                       | 2 (8)                   |
| Multiplicity (%)                          | 36 (30)                 | 15 (29)                 | 48 (31)                 | 3 (19)                  | 52 (34)                     | 4 (17)                  |
| Apgar 5 min (median (Q1; Q3))             | 8 (7; 8)                | 8 (7; 9)                | 8 (7; 9)                | 8 (6; 8)                | 8 (7; 9)                    | 8 (5; 8)                |
| Days parental nutrition (median (Q1; Q3)) | 13 (10; 17)             | 13 (10; 17)             | 12 (10; 17)             | 14 (13; 18)             | 12 (10; 17)                 | 14 (11; 20)             |
| >7 days of ventilation (%)                | 62 (50)                 | 28 (51)                 | 83 (52)                 | 7 (41)                  | 79 (51)                     | 11 (46)                 |
| Abdominal surgery (%)                     | 10 (8)                  | 5 (9)                   | 14 (9)                  | 1 (6)                   | 14 (9)                      | 1 (4)                   |
| Severe brain injury (%)                   | 14 (11)                 | 4 (7)                   | 17 (11)                 | 1 (6)                   | 15 (10)                     | 3 (13)                  |
| Sepsis (%)                                | 48 (39)                 | 23 (42)                 | 62 (39)                 | 9 (53)                  | 59 (38)                     | 12 (50)                 |

*DTI = diffusion tensor imaging; SGA = small for gestational age; \*p<0.05*
