# Supplementary material for: Nutritional Intake, White Matter Integrity, and Neurodevelopment in Extremely Preterm Born Infants
Source: MDPI journal article supplement (doi:10.3390/nu13103409), 2021-09-27
Supplement: s1 [file s1]

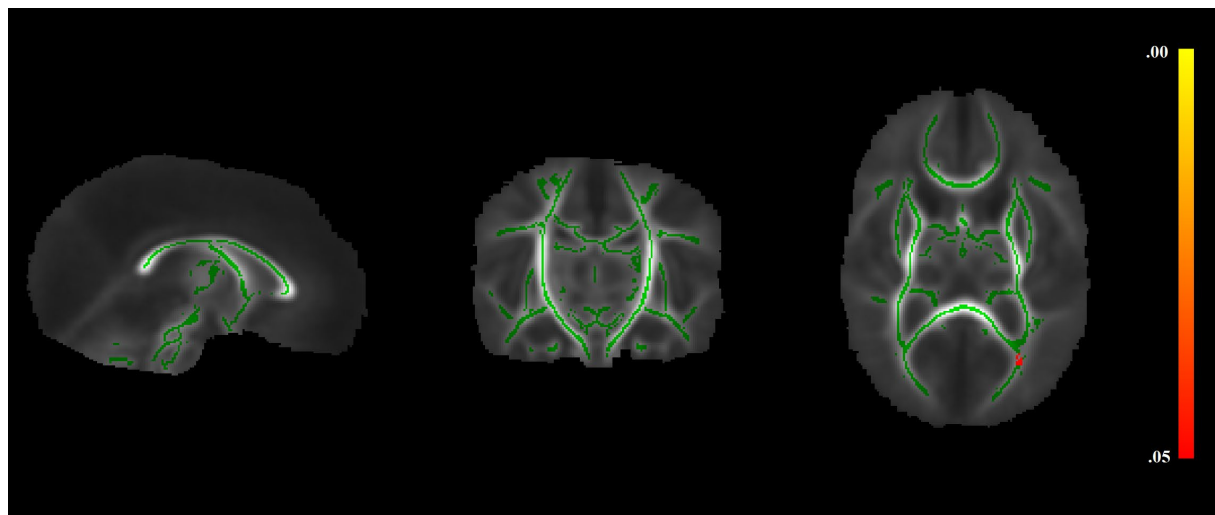

**Figure S1.** Cumulative enteral protein intake was associated with higher FA in the left posterior thalamic radiation. Significant voxels (red-yellow; color bar indicates  $p$ -value) are presented on top of the mean FA skeleton (green) and are viewed from a sagittal (left), coronal (middle), and axial (right) perspective.
