# Supplementary material for: Nutritional Intake, White Matter Integrity, and Neurodevelopment in Extremely Preterm Born Infants
Source: Nutrients. 2021 Sep 27;13(10):3409. doi: 10.3390/nu13103409 (PMC8539908; doi:10.3390/nu13103409)
Supplement: Supplementary file 1 [file nutrients-13-03409-s001.zip]

Archive with 4 entries (4 files):
- Hortensius_nutrition_DTI_neurodevelopment_Supplemental_Figure_1_250821.png
- Hortensius_nutrition_DTI_neurodevelopment_Supplemental_Figure_1_description_240921.pdf
- Hortensius_nutrition_DTI_neurodevelopment_Supplemental_Table_1_240921.pdf
- Hortensius_nutrition_DTI_neurodevelopment_Supplemental_Table_2_240921.pdf
